# Supplementary material for: Study of Different Chiral Columns for the Enantiomeric Separation of Azoles Using Supercritical Fluid Chromatography
Source: MDPI journal article supplement (doi:10.3390/separations10010009), 2022-12-23
Supplement: s1 [file s1]

**Table S2.** System suitability parameters referred to chromatograms of Figure 3.

|          | Sulconazole (A)      |                       |                       |                       |                 | Bifonazole (B)       |                      |                 |                 |      |
|----------|----------------------|-----------------------|-----------------------|-----------------------|-----------------|----------------------|----------------------|-----------------|-----------------|------|
| Compound | t <sub>r</sub> / min | Rs (α)                | Symmetry Factor       |                       | NTP             | t <sub>r</sub> / min | Rs (α)               | Symmetry Factor |                 | NTP  |
| 1        | 14.2                 | 1.7 (1.1)             | 1.38                  |                       | 5860            | 7.1                  | 5.3 (1.4)            | 1.50            |                 | 5827 |
| 2        | 15.6                 |                       | 1.43                  |                       | 5100            | 9.3                  |                      | 1.37            |                 | 7420 |
|          | Triadimenol (C)      |                       |                       |                       |                 | Tridimefon (D)       |                      |                 |                 |      |
| Compound | t <sub>r</sub> / min | RS <sub>1-2</sub> (α) | RS <sub>2-3</sub> (α) | RS <sub>3-4</sub> (α) | Symmetry Factor | NTP                  | t <sub>r</sub> / min | Rs (α)          | Symmetry Factor | NTP  |
| 1        | 9.0                  | 2.2                   |                       |                       | 1.02            | 3372                 | 4.3                  | 2.8 (1.2)       | 1.08            | 8153 |
| 2        | 10.4                 | (1.2)                 |                       |                       | 4.5             | 1.00                 | 3894                 |                 | 4.9             | 1.09 |
| 3        | 12.1                 |                       | (1.2)                 | 4.8                   | 0.92            | 4075                 |                      |                 |                 |      |
| 4        | 16.3                 |                       |                       |                       | (1.4)           | 1.17                 |                      |                 |                 |      |

\*NTP: number theoretical plates
