# Supplementary material for: Study of Different Chiral Columns for the Enantiomeric Separation of Azoles Using Supercritical Fluid Chromatography
Source: MDPI journal article supplement (doi:10.3390/separations10010009), 2022-12-23
Supplement: s1 [file s1]

**Table S1.** System suitability parameters referred to chromatograms of Figure 2.

| Modifier    | Isopropanol (A)      |                       |                       |                       |                 |      | Methanol (B)         |                       |                       |                       |                 |      |
|-------------|----------------------|-----------------------|-----------------------|-----------------------|-----------------|------|----------------------|-----------------------|-----------------------|-----------------------|-----------------|------|
| Triadimenol |                      |                       |                       |                       |                 |      |                      |                       |                       |                       |                 |      |
| Compound    | t <sub>r</sub> / min | Rs <sub>1-2</sub> (α) | Rs <sub>2-3</sub> (α) | Rs <sub>3-4</sub> (α) | Symmetry Factor | NTP  | t <sub>r</sub> / min | Rs <sub>1-2</sub> (α) | Rs <sub>2-3</sub> (α) | Rs <sub>3-4</sub> (α) | Symmetry Factor | NTP  |
| 1           | 10.1                 | 3.4                   |                       |                       | 1.14            | 5936 | 6.4                  | 3.2                   |                       |                       | 1.13            | 7829 |
| 2           | 12.1                 | (1.2)                 |                       |                       | 1.9             | 1.18 | 5064                 | 7.4                   |                       |                       | (1.2)           | 1.7  |
| 3           | 13.4                 |                       | (1.1)                 | 4.1                   | 1.10            | 5598 | 8.0                  |                       | (1.1)                 | 4.6                   | 1.06            | 8160 |
| 4           | 16.5                 |                       |                       | (1.3)                 | 1.11            | 7199 | 9.7                  |                       |                       | (1.3)                 | 1.08            | 9528 |

\*NTP: number theoretical plates
