# Supplementary material for: Study of Different Chiral Columns for the Enantiomeric Separation of Azoles Using Supercritical Fluid Chromatography
Source: MDPI journal article supplement (doi:10.3390/separations10010009), 2022-12-23
Supplement: s1 [file s1]

**Table S3.** System suitability parameters referred to chromatogram of Figure 4.

| Peak | Compound                    | t <sub>r</sub> / min | Rs <sub>1-2</sub><br>( $\alpha$ ) | Rs <sub>2-3</sub><br>( $\alpha$ ) | Rs <sub>3-4</sub><br>( $\alpha$ ) | Rs <sub>4-5</sub><br>( $\alpha$ ) | Rs <sub>5-6</sub><br>( $\alpha$ ) | Rs <sub>6-7</sub><br>( $\alpha$ ) | Rs <sub>7-8</sub><br>( $\alpha$ ) | Rs <sub>8-9</sub><br>( $\alpha$ ) | Rs <sub>9-10</sub><br>( $\alpha$ ) | Symmetry<br>Factor | NTP   |
|------|-----------------------------|----------------------|-----------------------------------|-----------------------------------|-----------------------------------|-----------------------------------|-----------------------------------|-----------------------------------|-----------------------------------|-----------------------------------|------------------------------------|--------------------|-------|
| 1    | Triadimefon - 1             | 3.6                  | 1.7                               | 8.4<br>(2.1)                      | 3.4<br>(1.3)                      | 3.2<br>(1.2)                      | 1.8<br>(1.1)                      | 16.6<br>(1.7)                     | 2.6<br>(1.1)                      | 5.6<br>(1.2)                      | 3.4<br>(1.1)                       | 1.02               | 4346  |
| 2    | Triadimefon - 2             | 3.9                  | (1.1)                             |                                   |                                   |                                   |                                   |                                   |                                   |                                   |                                    | 0.94               | 5253  |
| 3    | Triadimenol –<br>Threo - 1  | 6.6                  |                                   |                                   |                                   |                                   |                                   |                                   |                                   |                                   |                                    | 1.00               | 3938  |
| 4    | Triadimenol –<br>Erytro - 1 | 8.0                  |                                   |                                   |                                   |                                   |                                   |                                   |                                   |                                   |                                    | 1.02               | 6062  |
| 5    | Triadimenol –<br>Threo - 2  | 9.3                  |                                   |                                   |                                   |                                   |                                   |                                   |                                   |                                   |                                    | 0.98               | 8640  |
| 6    | Triadimenol –<br>Erytro - 2 | 9.9                  |                                   |                                   |                                   |                                   |                                   |                                   |                                   |                                   |                                    | 1.05               | 12323 |
| 7    | Bifonazole - 1              | 16.2                 |                                   |                                   |                                   |                                   |                                   |                                   |                                   |                                   |                                    | 0.97               | 25848 |
| 8    | Bifonazole - 2              | 17.4                 |                                   |                                   |                                   |                                   |                                   |                                   |                                   |                                   |                                    | 2.28               | 19153 |
| 9    | Sulconazole - 1             | 20.6                 |                                   |                                   |                                   |                                   |                                   |                                   |                                   |                                   |                                    | 2.30               | 17261 |
| 10   | Sulconazole - 2             | 23.0                 |                                   |                                   |                                   |                                   |                                   |                                   |                                   |                                   |                                    | 1.80               | 12899 |

\*NTP: number theoretical plates
